# Supplementary material
Source: MDPI journal article supplement (https://www.mdpi.com/2071-1050/13/13/7181)
Supplement: s1 [file s1 › Table S1.txt]

Field	Clayr	Fine silt	Coarse silt	Fine sand	Coarse sand	pH-H2O	pH-KCl	CEC	Total C content	Total N content	C/N	Total P content	C/P	Labile P content	K	Ca	Mg	Bulk density	Initial nematode density	Water-holding capacity
Units	%	%	%	%	%	unitless	unitless	cmol+ Kg-1	g kg-1	g kg-1	unitless	g kg-1	unitless	mg kg-1	cmol+ Kg-1	cmol+ Kg-1	cmol+ Kg-1	g.cm3	ind.g-1	%
1	38	30	8	8	16	5.33	4.43	2.75	27.54	2.55	10.79	1.39	19.85	4.06	0.08	0.62	0.36	1.01	3.57	25.86
2	50	19	6	10	15	4.99	4.13	2.64	26.73	2.28	11.73	1.18	22.63	5.59	0.08	0.75	0.25	0.96	4.97	33.78
3	45	21	5	9	20	5.01	4.15	3.00	29.57	1.63	18.17	0.63	47.16	1.97	0.04	0.56	0.19	1.17	2.77	31.66
4	40	24	5	9	22	4.98	4.05	3.32	29.77	1.71	17.41	0.59	50.10	4.59	0.03	0.61	0.26	1.04	1.69	23.98
5	28	18	7	16	31	5.17	4.28	1.72	14.00	1.47	9.53	0.45	31.04	1.54	0.02	0.61	0.22	1.19	9.05	27.31
6	25	22	9	11	32	5.26	4.39	3.25	16.37	1.33	12.29	0.55	29.92	2.78	0.05	1.31	0.32	1.21	6.58	31.04
7	53	18	5	9	16	4.95	4.17	2.02	25.52	2.17	11.75	1.01	25.29	1.97	0.07	0.51	0.15	1.06	3.89	32.32
8	57	15	4	9	15	5.01	4.18	1.82	26.66	2.17	12.30	0.89	29.83	1.27	0.07	0.48	0.15	1.07	2.65	26.02
9	38	31	6	7	18	5.42	4.34	2.69	33.91	3.08	11.03	1.14	29.77	0.34	0.08	0.76	0.28	1.22	3.34	17.83
10	59	19	4	6	12	5.20	4.10	3.53	23.35	2.30	10.16	1.55	15.02	8.59	0.25	1.07	0.58	0.95	7.59	16.60
11	59	13	3	8	16	4.73	4.14	1.81	30.85	2.48	12.46	0.91	34.00	0.58	0.06	0.55	0.15	1.04	10.74	34.79
12	34	20	5	8	33	5.07	4.14	2.31	26.71	1.90	14.04	0.74	36.13	5.36	0.07	1.03	0.33	1.12	6.01	29.34
13	47	12	5	7	29	4.95	4.01	3.09	19.15	2.01	9.53	0.44	43.98	1.55	0.06	0.91	0.37	1.15	3.38	27.67
14	46	14	6	6	28	4.89	3.91	3.65	26.45	1.90	13.91	0.65	40.86	3.92	0.11	0.93	0.35	1.15	4.60	27.67
15	34	19	7	9	31	5.01	4.27	2.28	30.17	1.58	19.12	0.75	40.02	0.40	0.04	0.41	0.16	1.09	3.73	31.60
16	38	30	7	8	16	4.61	4.30	2.41	29.76	2.86	10.41	1.27	23.40	0.63	0.06	0.55	0.17	0.98	6.34	18.67
17	40	30	9	9	13	5.09	4.25	2.03	26.24	2.46	10.69	1.28	20.45	1.61	0.05	0.52	0.19	0.99	6.58	26.65
