# Supplementary material
Source: MDPI journal article supplement (https://www.mdpi.com/2071-1050/13/13/7181)

Figure S1. Localization of the field in Madagascar.

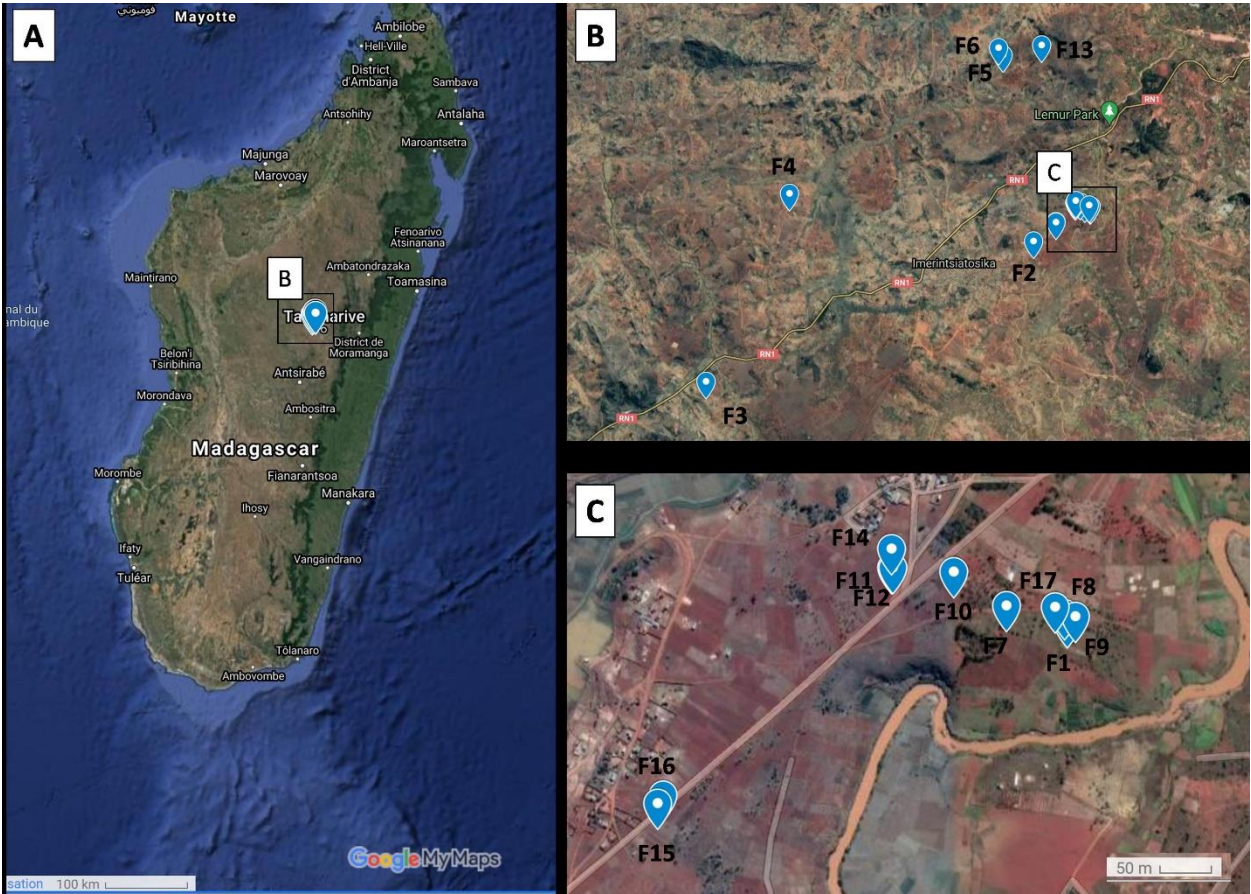

Supplement: s1 [file s1]
